# Supplementary material for: 1,5-anhydro-D-fructose induces anti-aging effects on aging-associated brain diseases by increasing 5’-adenosine monophosphate-activated protein kinase activity via the peroxisome proliferator-activated receptor-γ co-activator-1α/brain-derived neurotrophic factor pathway
Source: publisher site journal article supplement (doi:10.18632/aging.205228), 2023-11-09
Supplement: Supplementary file [file aging-v15i21-205228-supplementary-material-SD1.pdf]

**SUPPLEMENTARY FIGURES**

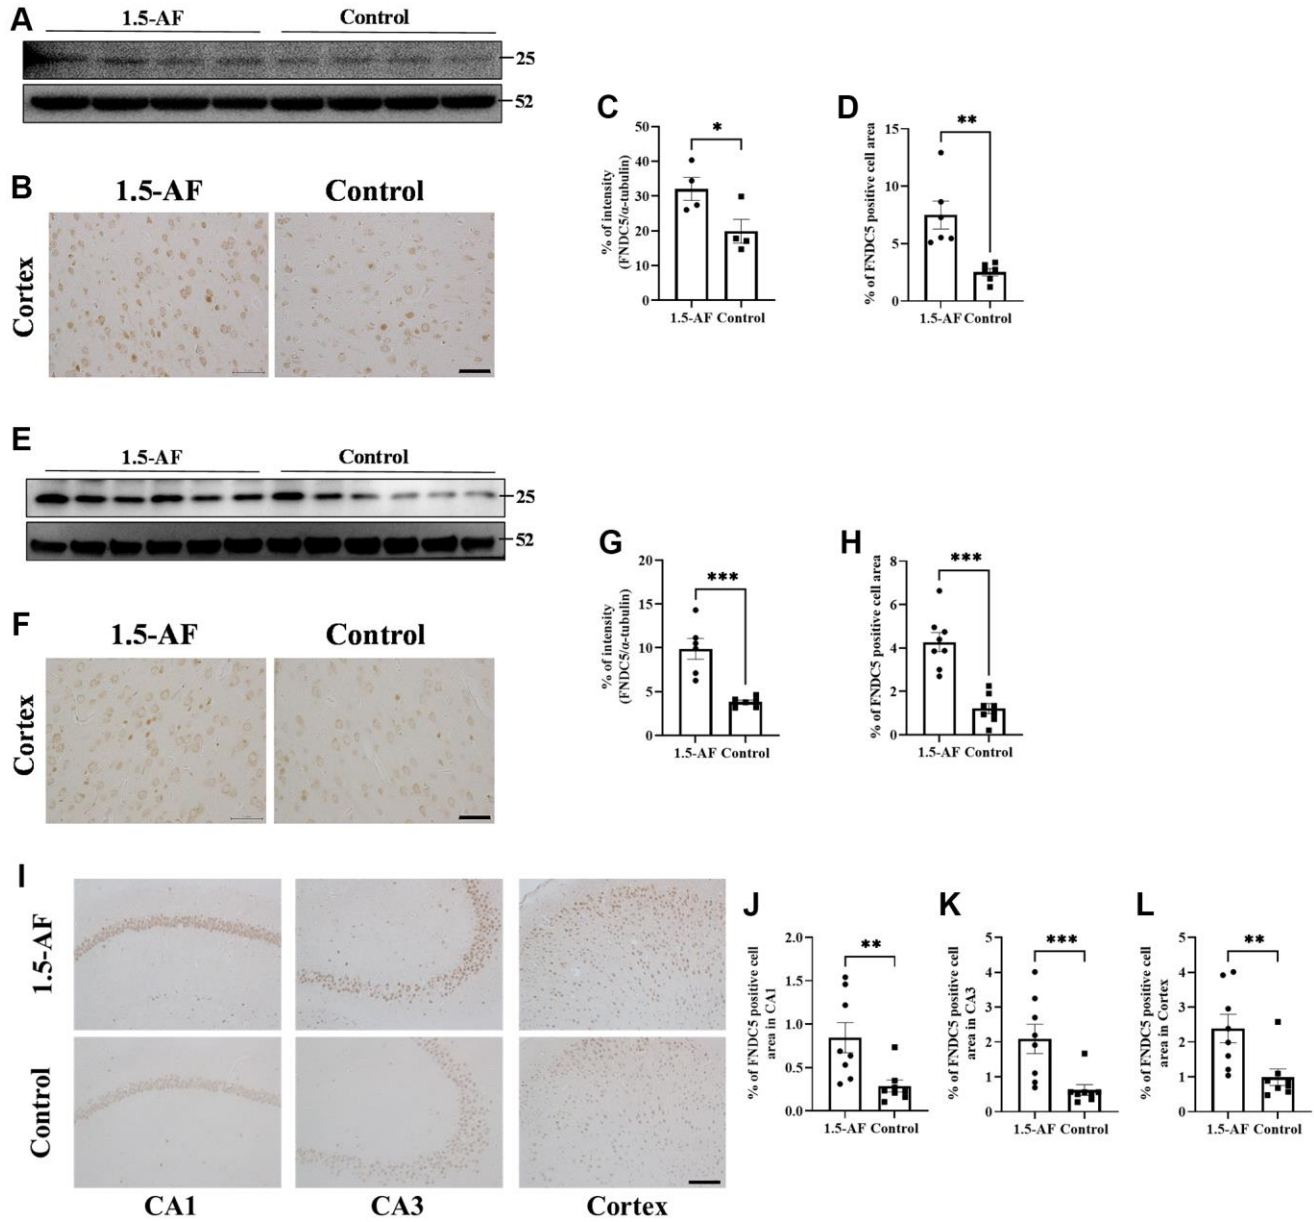

**Supplement Figure 1. FNDC5 expression in the brain of AIS, SHRSPs, and SAMP8.** Representative immunoblotting of FNDC5 (A) and photomicrographs of FNDC5 immunoreactivity (B) in AIS. The protein levels of FNDC5 significantly higher in the 1.5-AF rats than in the Control group (A, C,  $n = 4$ ) FNDC5 immunoreactivity significantly increased in the 1.5-AF group compared to that in the Control group (B, D,  $n = 6$ ). Representative immunoblotting of FNDC5 (E) and photomicrographs of FNDC5 immunoreactivity (F) in SHRSPs. The protein levels of FNDC5 significantly higher in the 1.5-AF rats than in the Control rats (E, G,  $n = 6$ ) FNDC5 immunoreactivity significantly increased in the 1.5-AF rats compared to that in the Control rats (F, H,  $n = 8$ ). Representative photomicrographs of FNDC5 immunoreactivity (I) in SAMP8. FNDC5 immunoreactivity significantly increased in the 1.5-AF rats compared to that in the Control rats (J–L,  $n = 8$ ). Data are shown as the mean  $\pm$  standard error. \* $p < 0.05$ , \*\* $p < 0.01$ , \*\*\* $p < 0.001$ . Scale bar = 50  $\mu$ m (B, F) and 100  $\mu$ m (I).

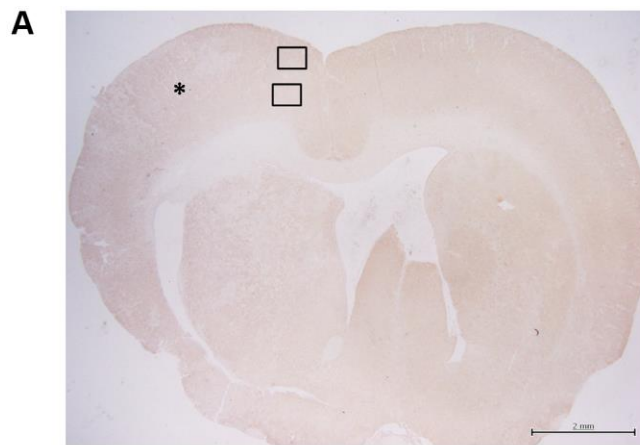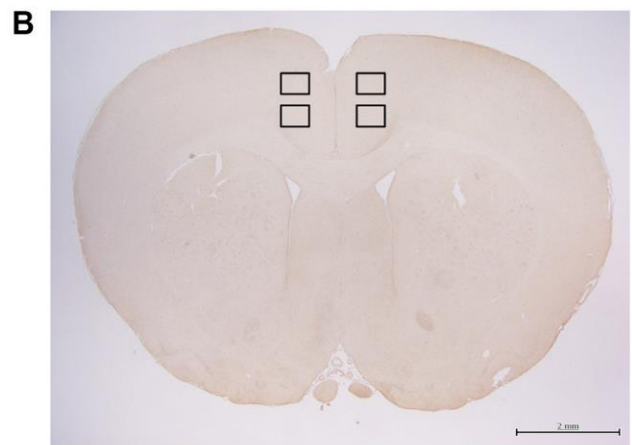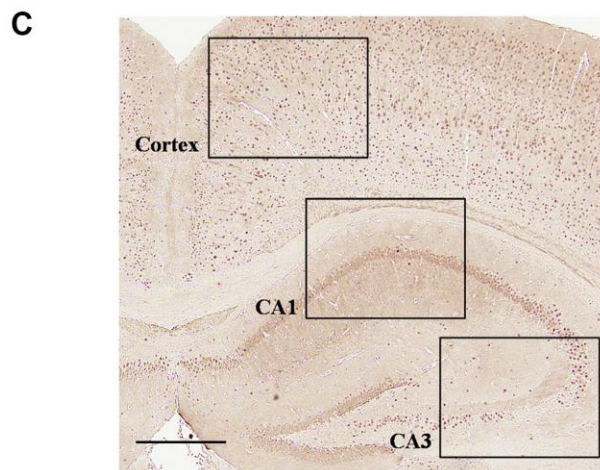

**Supplementary Figure 2. Photographs of representative quantitative sites.** Photographs of immunostaining in AIS (A), SHRSPs (B), and SAMP8 (C). The area enclosed by the square was quantified. \*Penumbra area. Scale bar = 2 mm (A, B) and 500  $\mu$ m (C).
